# Supplementary material for: A database of whole-body action videos for the study of action, emotion, and untrustworthiness
Source: PubMed Central journal article supplement (PMC4237924; doi:10.3758/s13428-013-0439-6), 2014-03-01
Supplement: 13428_2013_439_MOESM2_ESM.pdf [file 13428_2013_439_MOESM2_ESM.pdf]

| Actor number | Filename | Age | Gender | Department                  | Studying                           |
|--------------|----------|-----|--------|-----------------------------|------------------------------------|
| 1            | 001M     | 38  | M      | Psychology                  | Lecturer                           |
| 2            | 002F     | 20  | F      | Psychology                  | Psychology                         |
| 3            | 003M     | 21  | M      | Theatre film and television | Writing, Directing and Performance |
| 4            | 004F     | 20  | F      | Psychology                  | Psychology                         |
| 5            | 005M     | 29  | M      | Psychology                  | Psychology Post Doc                |
| 6            | 006F     | 26  | F      | Psychology                  | Psychology PhD                     |
| 7            | 007F     | 18  | F      | Theatre film and television | Writing, Directing and Performance |
| 8            | 008M     | 20  | M      | Theatre film and television | Writing, Directing and Performance |
| 9            | 009F     | 21  | F      | Theatre film and television | Writing, Directing and Performance |
| 10           | 010F     | 21  | F      | Theatre film and television | Writing, Directing and Performance |
| 11           | 011F     | 19  | F      | English                     | English Literature and Linguistics |
| 12           | 012M     | 33  | M      | Psychology                  | Psychology                         |
| 13           | 013F     | 19  | F      | Theatre film and television | Writing, Directing and Performance |
| 14           | 014F     | 19  | F      | Theatre film and television | Writing, Directing and Performance |
| 15           | 015M     | 22  | M      | Theatre film and television | Writing, Directing and Performance |
| 16           | 016F     | 19  | F      | Psychology                  | Psychology                         |
| 17           | 017F     | 20  | F      | Psychology                  | Psychology                         |
| 18           | 018F     | 21  | F      | Politics                    | Politics                           |
| 19           | 019M     | 19  | M      | Theatre film and television | Writing, Directing and Performance |
| 20           | 020F     | 19  | F      | Theatre film and television | Acting                             |
| 21           | 021M     | 32  | M      | Psychology                  | Psychology                         |
| 22           | 022F     | 22  | F      | Psychology                  | Psychology                         |
| 23           | 023F     | 21  | F      | Psychology                  | Psychology                         |
| 24           | 024F     | 19  | F      | Maths                       | Maths                              |

|    |      |    |   |                             |                                    |
|----|------|----|---|-----------------------------|------------------------------------|
| 25 | 025M | 28 | M | Physical Education          | Teacher                            |
| 26 | 026F | 24 | F | Theatre film and television | Writing, Directing and Performance |
| 27 | 027M | 19 | M | Theatre film and television | Writing, Directing and Performance |
| 28 | 028F | 23 | F | Psychology                  | Psychology                         |
| 29 | 029F | 20 | F | Psychology                  | Psychology                         |

|              |                |          |                |                |
|--------------|----------------|----------|----------------|----------------|
| No. of Males | No. of Females | No. TFTV | No. Psychology | No. other dept |
| 10           | 19             | 12       | 13             | 4              |
