# Supplementary material for: A database of whole-body action videos for the study of action, emotion, and untrustworthiness
Source: PubMed Central journal article supplement (PMC4237924; doi:10.3758/s13428-013-0439-6), 2014-03-01
Supplement: 13428_2013_439_MOESM3_ESM.pdf [file 13428_2013_439_MOESM3_ESM.pdf]

| Trait          | Neutral | Angry | Fearful | Happy | Sad | Untrustworthy |
|----------------|---------|-------|---------|-------|-----|---------------|
| No. of stimuli | 174     | 522   | 522     | 522   | 522 | 521           |

| Action         | Jump | Put down box | Pick up box | Sit down | Stand and act | Walking |
|----------------|------|--------------|-------------|----------|---------------|---------|
| No. of stimuli | 464  | 464          | 464         | 464      | 463           | 464     |

Not recorded due to a filming error: 027m\_unt\_2\_sta
