# Supplementary material for: A database of whole-body action videos for the study of action, emotion, and untrustworthiness
Source: PubMed Central journal article supplement (PMC4237924; doi:10.3758/s13428-013-0439-6), 2014-03-01
Supplement: 13428_2013_439_MOESM4_ESM.pdf [file 13428_2013_439_MOESM4_ESM.pdf]

# Key for video file names

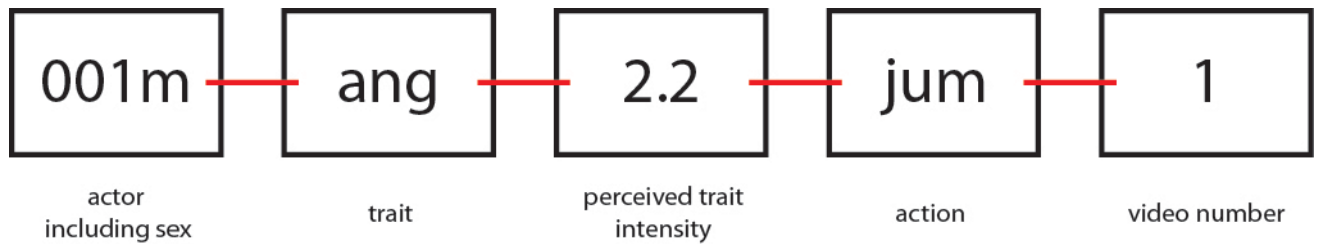

## Actor

001 – 029

f = female

m = male

## Trait

ang = angry

fea = fearful

hap = happy

neu = neutral

sad = sad

unt = untrustworthy

## Perceived trait intensity

1 – 9

## Action

sta = standing and acting

pdb = put down box

pub = pick up box

sit = sitting

jum = jumping

win = walking

## Number

Incremental number for multiple instances of videos with identical actor, trait, perceived trait intensity and action
